# Supplementary material for: Knowledge of cardiovascular disease risk factors among caregivers of cardiology patients attending Jordan University Hospital
Source: PeerJ journal article supplement (doi:10.7717/peerj.16830), 2024-01-31
Supplement: Questionnaire_Arabic.pdf [file Questionnaire_Arabic.pdf]

# المعرفة بعوامل خطر الإصابة بأمراض القلب والأوعية الدموية بين القائمين على رعاية مرضى القلب في مستشفى الجامعة الأردنية

نحن مجموعة من الطلاب في الجامعة الأردنية - كلية الطب نقوم بإجراء هذه الدراسة المقطعية ، والتي تهدف إلى تقييم معرفة وفهم عوامل الخطر لأمراض القلب التاجية وأعراضها بين القائمين على رعاية المرضى الخارجيين الذين يراجعون عيادات القلب في مستشفى الجامعة الأردنية في الأردن.

إكمال هذا الاستبيان يحتاج إلى 5 دقائق فقط

جميع المعلومات المقدمة ستنقى سرية وسوف تستخدم لأغراض البحث العلمي فقط.

\* Indicates required question

1. \* هل توافق على المشاركة في هذه الدراسة

Mark only one oval.

نعم

لا

Untitled Section

2. اسم الباحث

Mark only one oval.

- زيد
- اسامة
- اية
- باسل
- عطاري
- خطيب

3. \* العمر

---

4. \* الجنس

Mark only one oval.

- ذكر
- أنثى

5. \* المستوى التعليمي

Mark only one oval.

- لا تعليم أساسي
- المرحلة الأساسية
- المرحلة الثانوية
- بكالوريوس أو أعلى

## 6. \* الحالة الزوجية

Mark only one oval.

- أعزب
- متزوج
- مطلق
- أرمل

## 7. \* الوظيفة

Mark only one oval.

- لا أعمل
- طالب
- موظف
- أعمال حرة
- متقاعد

## 8. \* الدخل الشهري

Mark only one oval.

- أقل من 500
- 500-1000
- 1000-1500
- 1500-2000
- أكثر من 2000

9. \* مكان السكن

Mark only one oval.

مدينة

قرية

10. \* علاقتك مع المريض الذي ترعاه/تصاحبه

Mark only one oval.

زوج

ابن

شقيق

والد

صديق

11. \* هل لديك تأمين صحي

Mark only one oval.

نعم

لا

12. \* كيف تصف حالتك الصحية

Mark only one oval.

جيدة

متوسطة

سيئة

13. \* متى كانت آخر مرة قمت بفحوصات دورية للصحة العامة

Mark only one oval.

- لم أقم بفحوصات أبدًا
- خلال سنة
- خلال أكثر من سنة

14. \* هل لديك أي من الأمراض الآتية

Check all that apply.

- أمراض القلب والأوعية الدموية مثل ألسكتة القلبية
- سكتة دماغية
- ارتفاع ضغط الدم
- السكري
- أمراض الكلى المزمنة
- أمراض تنفسية مزمنة
- سرطان
- لا

15. \* هل هناك تاريخ عائلي لمرض القلب التاجي

Mark only one oval.

- نعم
- لا
- لا أعلم

16. \* هل هناك تاريخ عائلي لوفيات إناث أقل من ٦٥ سنة أو ذكور أقل من ٥٥ سنة بسبب أمراض القلب

Mark only one oval.

- نعم
- لا
- لا أعلم

17. \* هل أنت مدخن

Mark only one oval.

- لا لم أدمن أبدًا
- نعم (على الأقل سيجارة واحدة في آخر 6 أشهر)
- مدخن سابق (لم أدمن في آخر 6 أشهر)

18. \* كم يوم تمارس الرياضة في الأسبوع

Mark only one oval.

- لا أمارس الرياضة
- Other: \_\_\_\_\_

19. \* كم دقيقة تمارس الرياضة في اليوم الواحد

Mark only one oval.

- لا أمارس الرياضة
- Other: \_\_\_\_\_

20. \* الوزن

\_\_\_\_\_

21. \* الطول

---

22. \* كم تقدر قلقك من احتمالية الإصابة بسكتة قلبية

*Mark only one oval.*

لست قلقاً أبداً

قلق بنسبة ضئيلة

شديد القلق

23. \* أجب عن الأسئلة التالية بناءً على معرفتك بأمراض القلب التاجية

Mark only one oval per row.

|                                                                                        | نعم                   | لا                    |
|----------------------------------------------------------------------------------------|-----------------------|-----------------------|
| يمكن الشفاء<br>من أمراض<br>القلب التاجية<br>عند إكمال<br>جرعة<br>الدواء<br>الموصوفة    | <input type="radio"/> | <input type="radio"/> |
| أمراض<br>القلب هي<br>السبب<br>الرئيسي في<br>الوفاة عالمياً                             | <input type="radio"/> | <input type="radio"/> |
| التدخين لا<br>يزيد من<br>نسبة حدوث<br>أمراض<br>القلب                                   | <input type="radio"/> | <input type="radio"/> |
| داء السكري<br>يزيد من<br>نسبة حدوث<br>أمراض<br>القلب                                   | <input type="radio"/> | <input type="radio"/> |
| ارتفاع<br>ضغط الدم<br>هو عامل<br>مساعدة في<br>حدوث<br>أمراض<br>القلب                   | <input type="radio"/> | <input type="radio"/> |
| يعد الإكثار<br>من شرب<br>الكحوليات<br>خطراً على<br>صحة<br>الجهاز<br>القلبي<br>والوعائي | <input type="radio"/> | <input type="radio"/> |



ارتفاع  
الكوليسترول  
في الدم  
يجمي من  
الإصابة  
بأمراض  
القلب



استهلاك  
الكثير من  
الخضروات  
والفاكهة  
يزيد من  
احتمالية  
الإصابة  
بأمراض  
القلب



استهلاك  
الكثير من  
ملح الطعام  
يشكل خطراً  
على الجهاز  
القلبي  
والوعائي



الوزن الزائد  
يزيد من  
احتمالية  
الإصابة  
بأمراض  
القلب



ممارسة  
الرياضة  
بانتظام تقلل  
من احتمالية  
إصابة  
الشخص  
بأمراض  
القلب



يعد كبار  
السن عاملاً  
خطراً  
للإصابة  
بأمراض  
القلب

بأمراض  
الرجل  
القلب  
عرضة أكثر

للإصابة  
بالرجل  
بأمراض  
عرضة أكثر  
القلب مقارنة  
للإصابة  
بالتنساء  
بأمراض

القلب مقارنة  
لا يمكن  
بالتنساء  
الوقاية من

أمراض  
لا يمكن  
القلب

الوقاية من  
والأوعية  
أمراض  
الدموية  
القلب

والأوعية  
التوقف عن  
الدموية  
التدخين يقلل

احتمالية  
التوقف عن  
الإصابة  
التدخين يقلل  
بشكله قلبي  
احتمالية

الإصابة  
البروتين  
بشكله قلبي  
الدهني عالي

الكثافة  
البروتين  
(HDL)  
الدهني عالي  
يشير إلى  
الكثافة  
الكوليسترول  
(HDL)  
الجيد و  
يشير إلى  
البروتين  
الكوليسترول  
الدهني قليل

الكثافة  
البروتين  
(HDL)  
الدهني قليل  
يشير إلى  
الكثافة  
الكوليسترول  
(LDL)  
السيء  
يشير إلى

الكوليسترول  
يعتبر ضغط  
السيء  
140/90

ارتفاعاً في  
يعتبر ضغط  
ضغط الدم  
140/90

ارتفاعاً في  
يمكن لغير  
ضغط الدم  
المدخنين أن

يموتوا من  
يمكن لغير  
المدخنين أن  
السليبي  
يموتوا من

التدخين  
السليبي

24. \* هل تعتقد أن الشكاوى التالية هي أعراض لنوبة قلبية؟

Mark only one oval per row.

|                                                               | نعم                   | لا                    |
|---------------------------------------------------------------|-----------------------|-----------------------|
| ألم أو<br>انزعاج<br>في الصدر                                  | <input type="radio"/> | <input type="radio"/> |
| ألم أو<br>إزعاج في<br>الفك أو<br>الرقبة أو<br>الظهر           | <input type="radio"/> | <input type="radio"/> |
| ألم أو<br>إزعاج في<br>الذراعين<br>أو الكتفين                  | <input type="radio"/> | <input type="radio"/> |
| ضيق في<br>التنفس                                              | <input type="radio"/> | <input type="radio"/> |
| الشعور<br>بالضعف<br>أو الدوار<br>أو الإغماء                   | <input type="radio"/> | <input type="radio"/> |
| صعوبة<br>مفاجئة في<br>الرؤية<br>بلجدي<br>العينين أو<br>كلاهما | <input type="radio"/> | <input type="radio"/> |

25. \* ما هو مصدر معلوماتك عن أمراض القلب

*Check all that apply.*

- الأطباء / المرضى / غيرهم من المهنيين الصحيين
- الأصدقاء أو العائلة والأقارب
- الانترنت
- التلفاز
- الجرائد أو المجلات
- Other: \_\_\_\_\_

---

This content is neither created nor endorsed by Google.

Google Forms
